# Supplementary material
Source: publisher figshare collection journal article supplement (https://acs.figshare.com/ndownloader/files/24189295)
Supplement: Supplementary file 1 [file 24189295]

**Preparation of nickel decorated and nitrogen-doped carbon  
nanotubes for Highly Efficient Hydrogen Evolution Reaction by  
Hydrothermal Method**

*Yingjiang Qian, Shaofeng Huang, Dongxu Li\**  
*College of Materials Science and Engineering, Huaqiao University, Xiamen 361021,  
China*

**\*Corresponding Email: [lidongxu@hqu.edu.cn](mailto:lidongxu@hqu.edu.cn)**

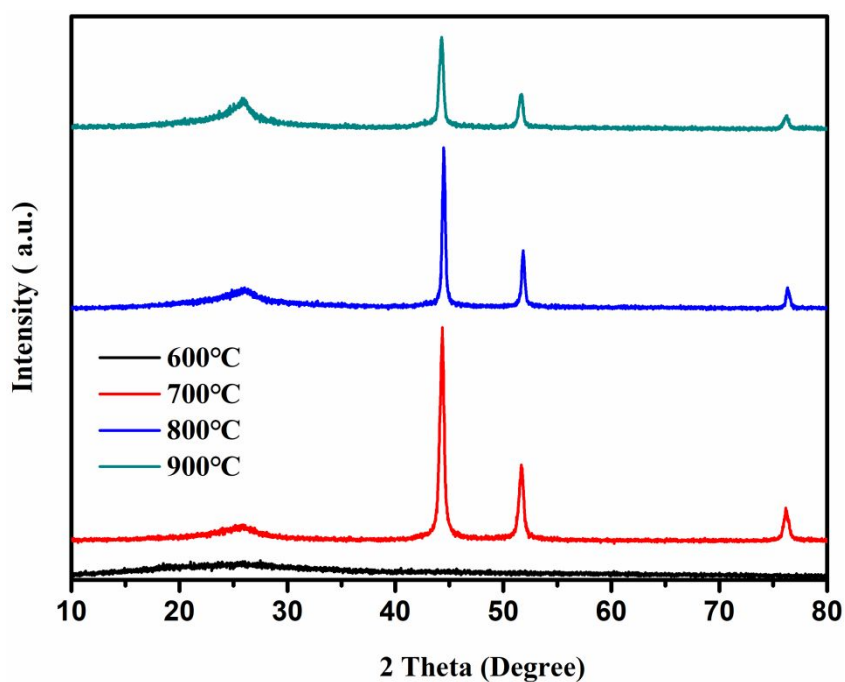

Figure S1. The XRD patterns of Ni-NCNT in different temperatures

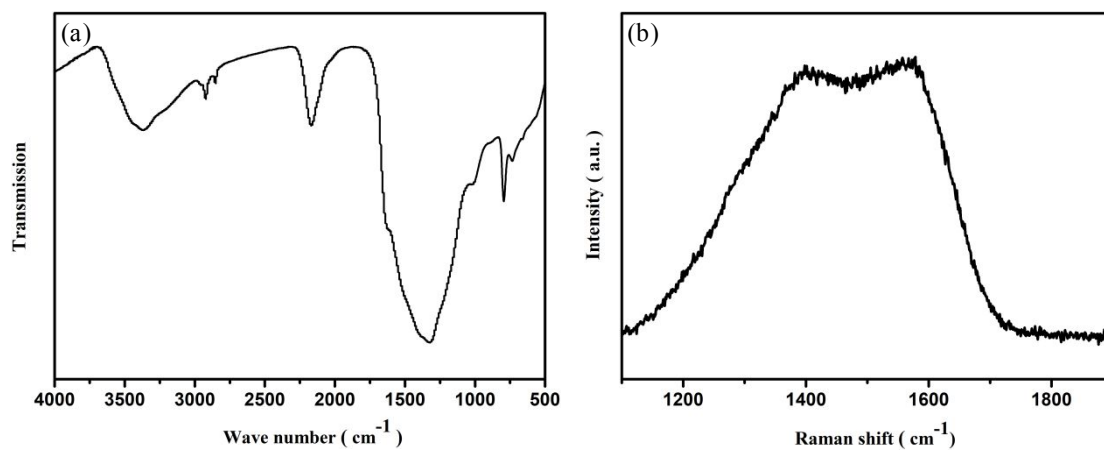

Figure S2. FTIR (a) and Raman (b) of Ni-NCNT in 600 °C

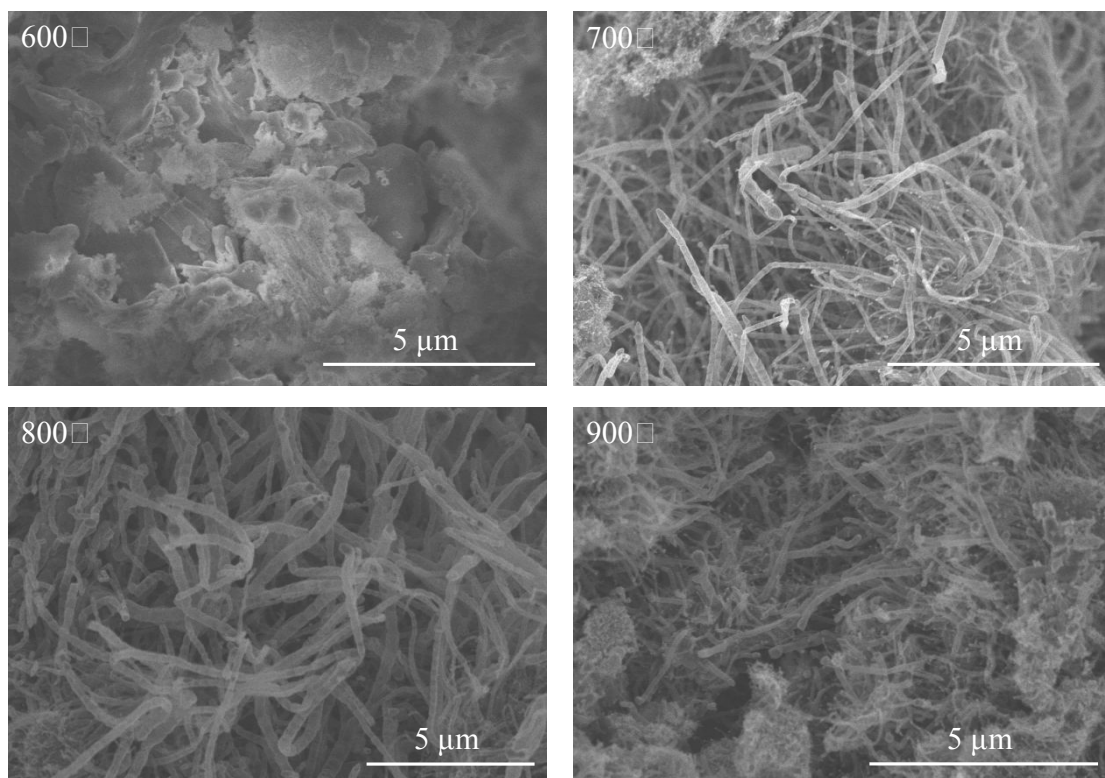

Figure S3. The SEM images of Ni-NCNT in different temperatures

Table 1. Element composition of the sample in 700 °C by EDS

| Element | Weight percentage | atomic percentage |
|---------|-------------------|-------------------|
| C K     | 71.38             | 86.92             |
| N K     | 3.52              | 3.68              |
| O K     | 4.73              | 4.32              |
| Ni K    | 20.37             | 5.07              |

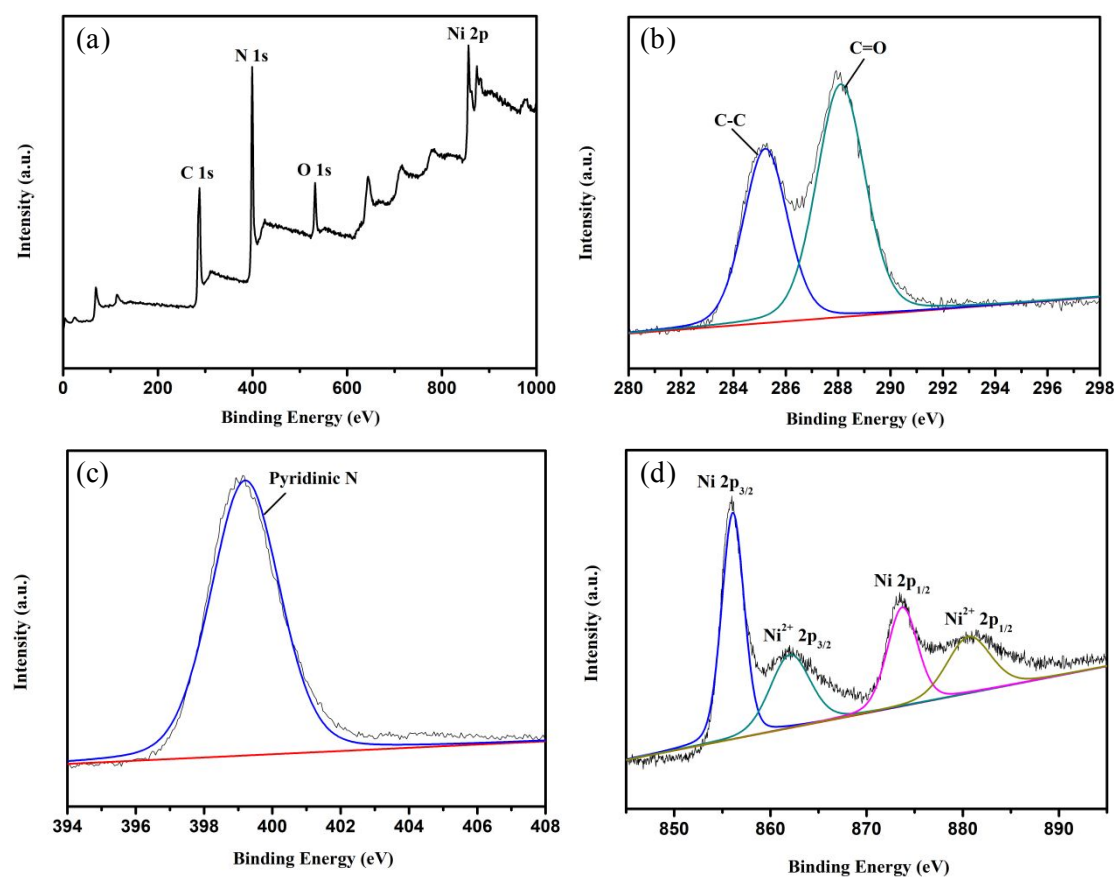

Figure S4. XPS survey (a), C 1s (b), N 1s (c) and Ni 2p (d) spectrum of Ni-NCNT (600 °C).

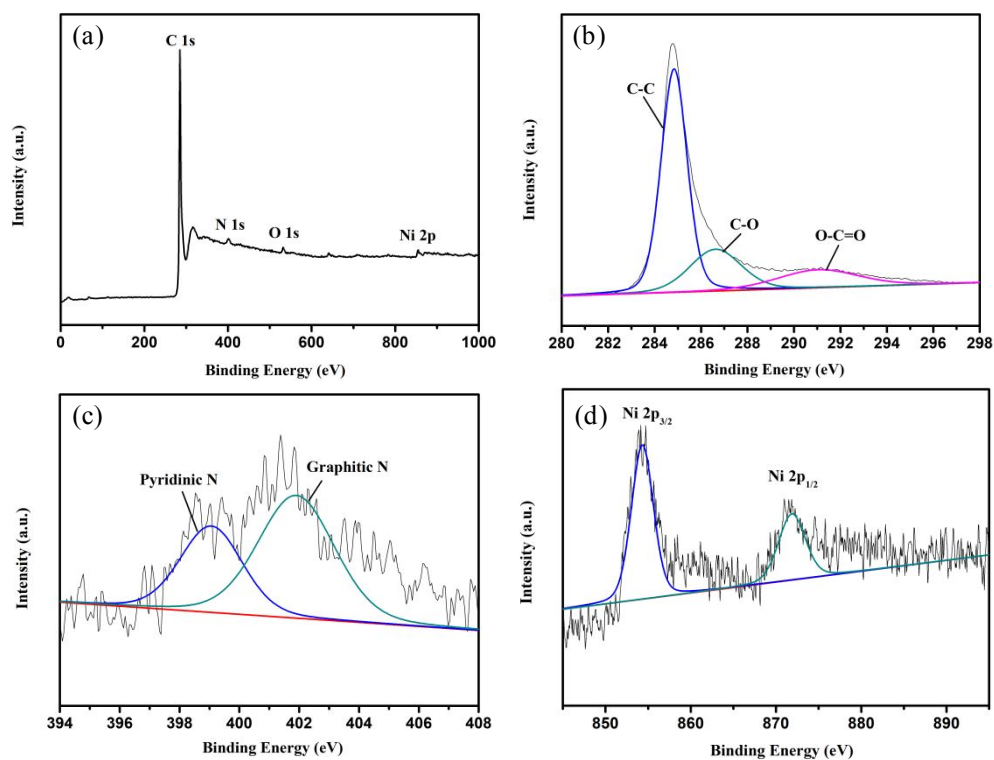

Figure S5. XPS survey (a), C 1s (b), N 1s (c) and Ni 2p (d) spectrum of Ni-NCNT (800 °C).

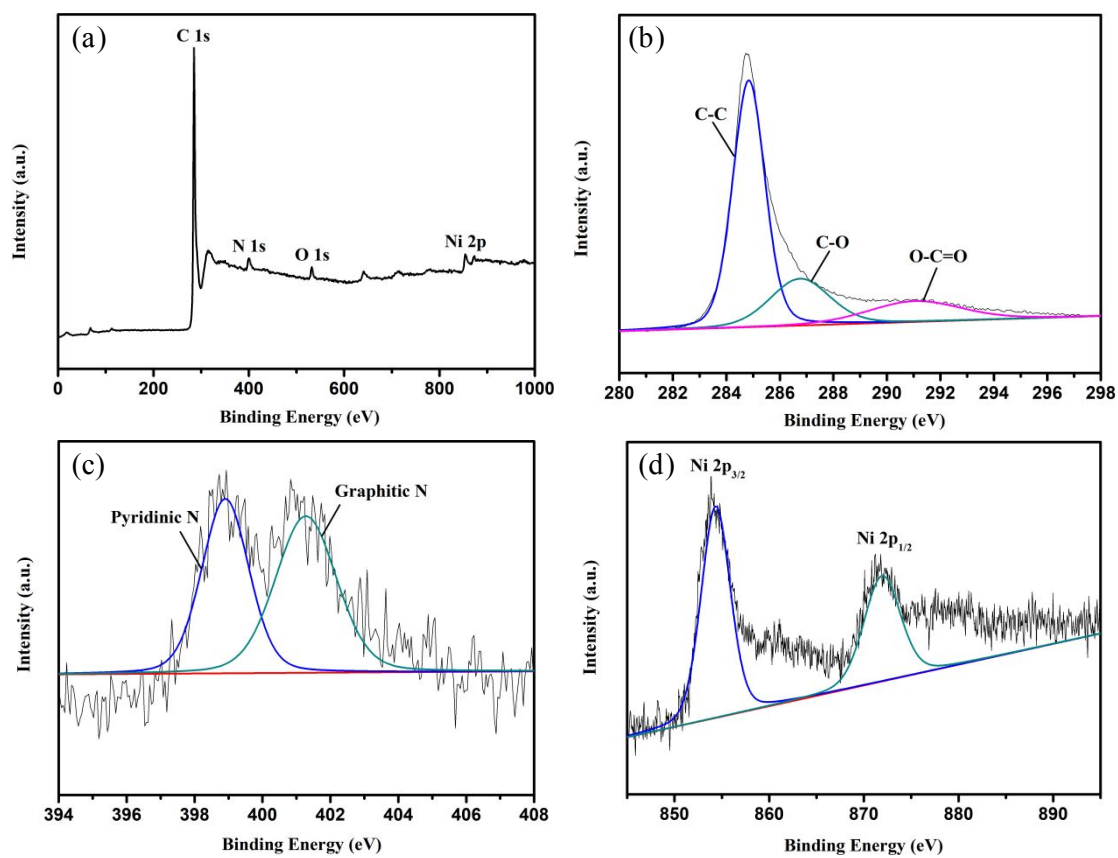

Figure S6. XPS survey (a), C 1s (b), N 1s (c) and Ni 2p (d) spectrum of Ni-NCNT (900 °C).

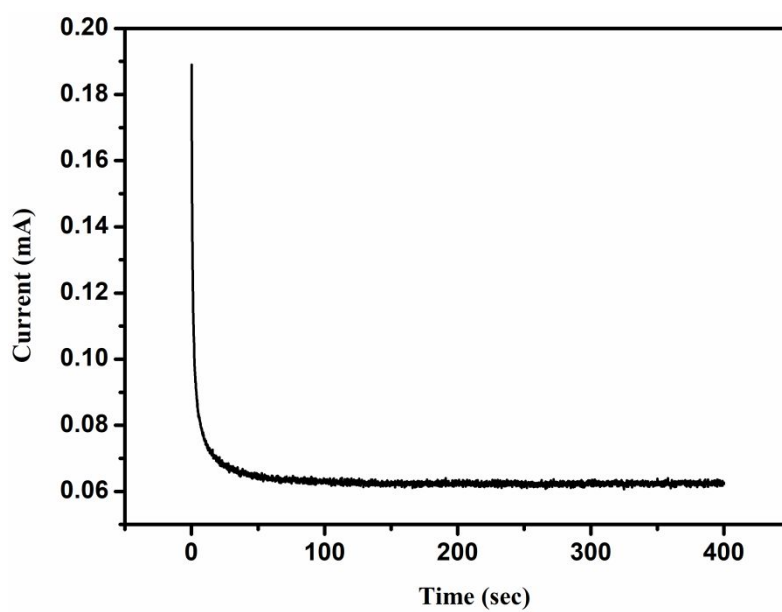

Figure S7. i-t curves of Ni-NCNT in 700 °C

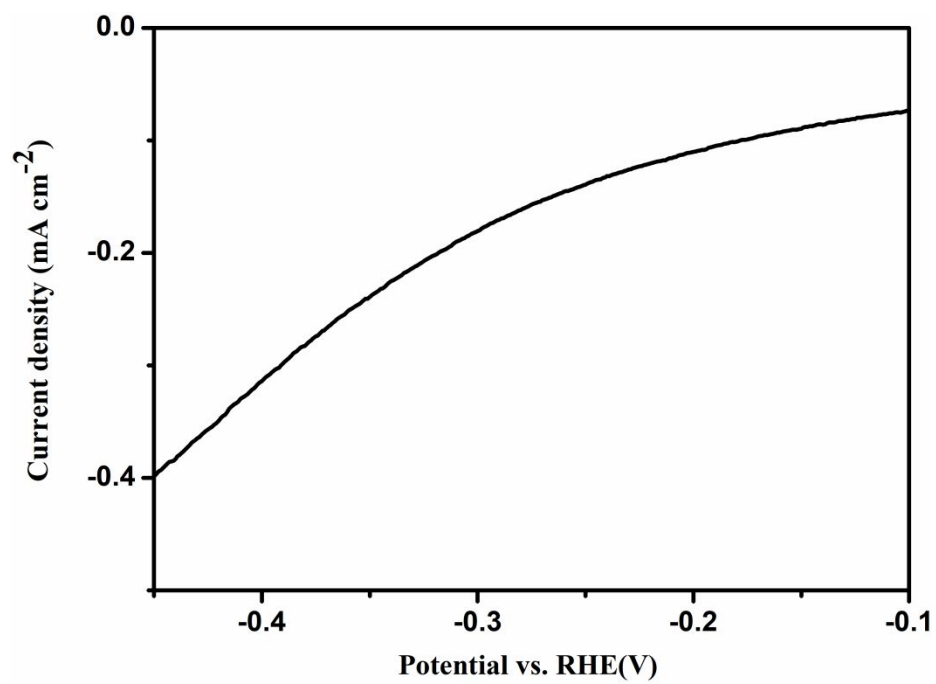

Figure S8. LSV curves of Ni-NCNT in 600 °C

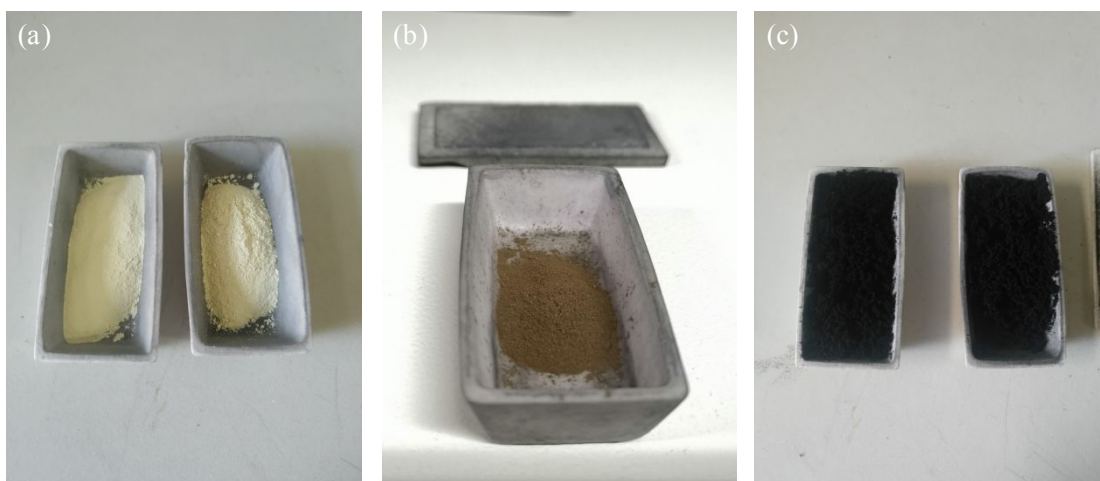

Figure S9. precursor (a), 600 °C (b) and 700 °C (c) of Ni-NCNT

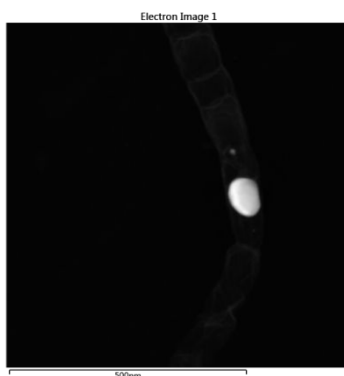

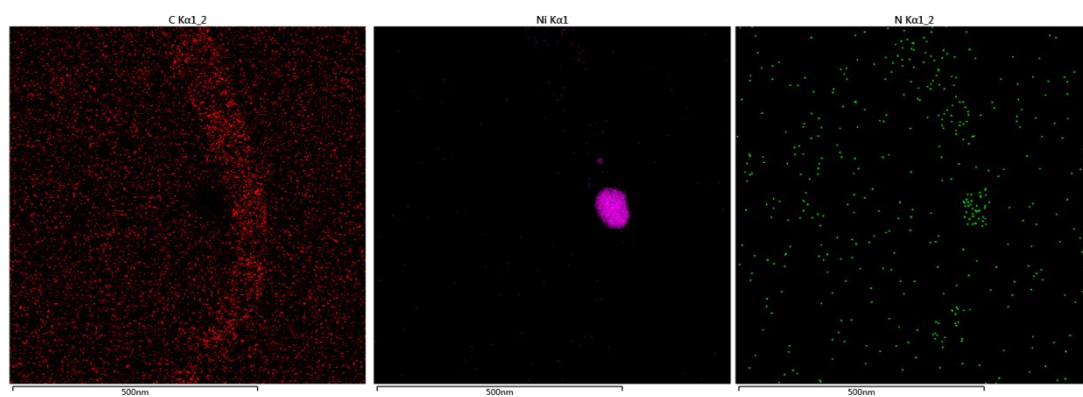

Figure S10. TEM image and EDS mapping of Ni-NCNT
